# Supplementary material
Source: PubMed Central journal article supplement (PMC4174294)
Supplement: NIHMS60298-supplement-Supplementary_table_1.pdf [file NIHMS60298-supplement-Supplementary_table_1.pdf]

# Generation of a canine anti-EGFR (ErbB-1) antibody for passive immunotherapy in dog cancer patients.

Singer, Fazekas et al.

**Supplementary Table 1: Amino acid sequences of can225IgG.**

| <b>Antibody Region</b>                   | <b>Amino Acid Sequence</b>                                                                                                                                                                                                                                                                                                                                                                                                                                                                                                                                                                                                                                                                                                                 |
|------------------------------------------|--------------------------------------------------------------------------------------------------------------------------------------------------------------------------------------------------------------------------------------------------------------------------------------------------------------------------------------------------------------------------------------------------------------------------------------------------------------------------------------------------------------------------------------------------------------------------------------------------------------------------------------------------------------------------------------------------------------------------------------------|
| <b>Variable region heavy chain</b>       | Q V Q L K Q S G P G L V Q P S Q S L S I T C<br>T V S G F S L T N Y G V H W V R Q S P G K G<br>L E W L G V I W S G G N T D Y N T P F T S R<br>L S I N K D N S K S Q V F F K M N S L Q S N<br>D T A I Y Y C A R A L T Y Y D Y E F A Y W G<br>Q G T L V T V S A                                                                                                                                                                                                                                                                                                                                                                                                                                                                               |
| <b>Constant region gamma heavy chain</b> | A S T T A P S V F P L A P S C G S Q S G S T<br>V A L A C L V S G Y I P E P V T V S W N S G<br>S L T S G V H T F P S I L Q S S G L Y S L S<br>S M V T V P S S R W P S E T F T C N V A H P<br>A T N T K V D K P V V K E C E C K C N C N N<br>C P C P G C G L L G G P S V F I F P P K P K<br>D I L V T A R T P T V T C V V T A N L D P E N<br>P E V Q I S W F V D S K Q V Q V D A N T Q P R<br>E E Q S N G T Y R V V S V L P I G H Q D W L<br>S G K Q F K C K V N N K A L P S P I E E I I<br>S K T P G Q A H Q P N V Y V L P P S R D E M<br>S K N T V T L T C L V K D F F P P E I D V E<br>W Q S N G Q Q E P E S K Y R M T P P Q L D E<br>D G S Y F L Y S K L S V D K S R W Q R G D T<br>F I C A V M H E A L H N H Y T Q K S L S H S<br>P G K |
| <b>Variable region light chain</b>       | M D M R V P A Q L L G L L L L C L Q G A R C<br>D I L L T Q S P V I L S V S P G E R V S F S<br>C R A S Q S I G T N I H W Y Q Q R T N G S P<br>R L L I K Y A S E S I S G I P S R F S G S G<br>S G T D F T L S I N S V E S E D I A D Y Y C<br>Q Q N N N W P T T F G A G T K L E L K R T V<br>A A                                                                                                                                                                                                                                                                                                                                                                                                                                              |
| <b>Constant region kappa light chain</b> | P A V Y L F Q P S P D Q L H T G S A S V V C<br>L L N S F Y P K D I N V K W K V D G V I Q D<br>T G I Q E S V T E Q D K D S T Y S L S S T L<br>T M S S T E Y L S H E L Y S C E I T H K S L<br>P S T L I K S F Q R S E C Q R V D                                                                                                                                                                                                                                                                                                                                                                                                                                                                                                              |
